# Supplementary material for: Three-dimensional N, P, and O tri-doped porous carbon for multifunctional electrocatalytic reactions
Source: Royal Society of Chemistry journal article supplement (doi:10.1039/d3ya00493g), 2023-12-04
Supplement: d3ya00493g1.pdf [file d3ya00493g1.pdf]

## Supporting Information

### Three-dimensional N, P, and O tri-doped porous carbon for multifunctional electrocatalytic reactions

*Lulu Chen<sup>a</sup>, Yanan zhang<sup>a</sup>, Zhihui Liu<sup>b</sup>, Liqiang Hou<sup>a,\*</sup>, Xien Liu<sup>a,\*</sup>*

<sup>a</sup> State Key Laboratory Base of Eco-Chemical Engineering, College of Chemical Engineering, Qingdao University of Science and Technology, Qingdao 266042 (China)

<sup>b</sup> Lanzhou Petrochemical Research Center, Petrochemical Research Institute, PetroChina, Lanzhou 730060, China

\* Corresponding authors: L Hou, houliqiang@qust.edu.cn; X. Liu, liuxien@qust.edu.cn

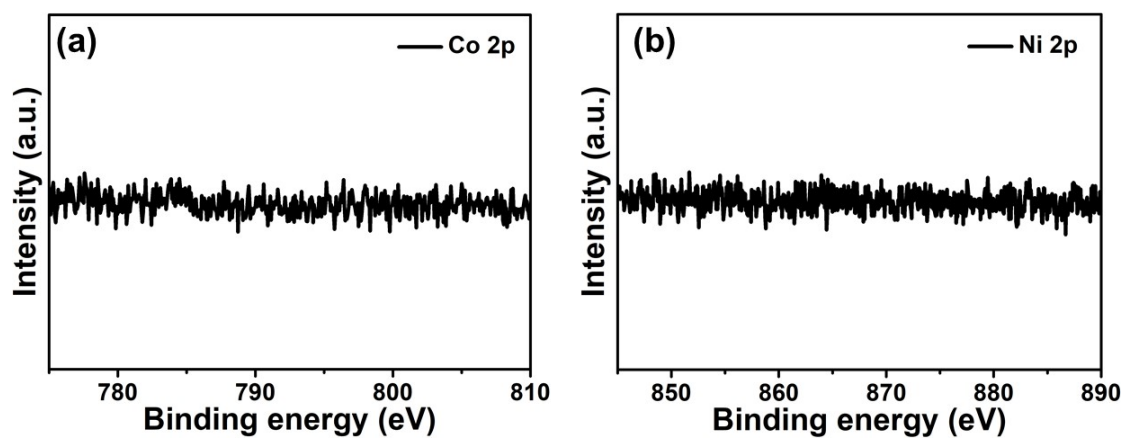

**Figure S1** The high-resolution XPS of (a) Co 2p and (b) Ni 2p in 3D-NPOC.

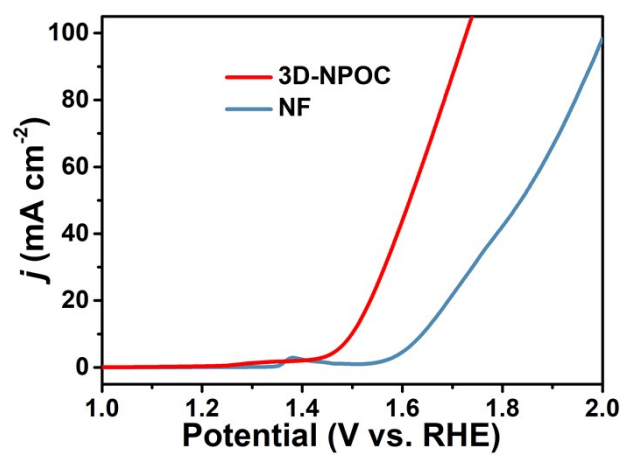

**Figure S2** The comparison between blank NF and 3D-NPOC of OER activity.

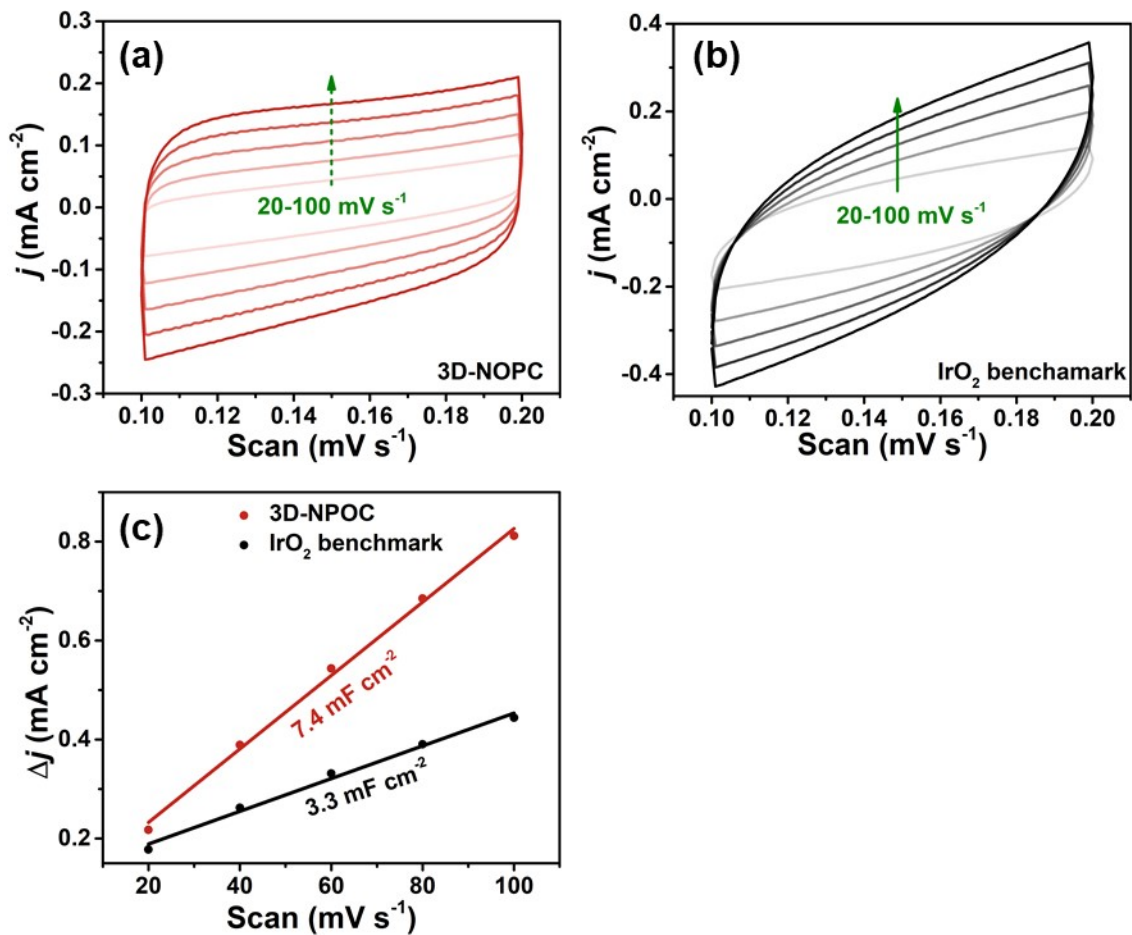

**Figure S3** The CV curves recorded at different scan rates for (a) 3D-NPOC, (b) Commercial IrO<sub>2</sub>. (c) Double-layer capacitance ( $C_{dl}$ ).

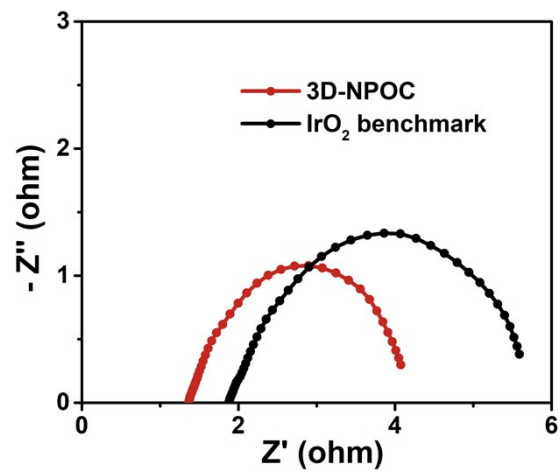

**Figure S4** Nyquist plots of 3D-NPOC and IrO<sub>2</sub> benchmark.

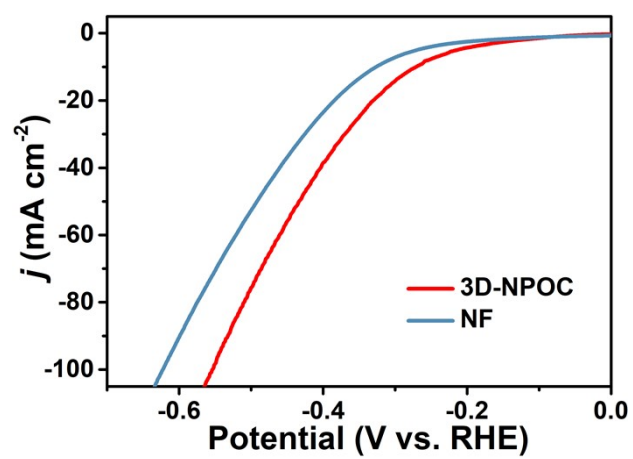

**Figure S5** The comparison between blank NF and 3D-NPOC of HER activity.

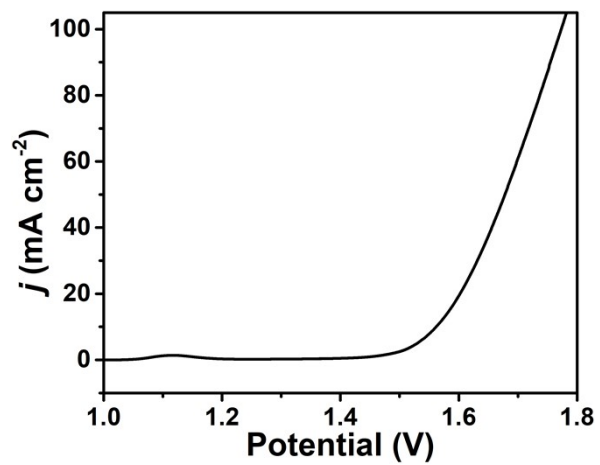

**Figure S6** Overall catalytic water splitting activity of 3D-NPOC in 1 M KOH.
